# Supplementary material
Source: publisher site journal article supplement (https://www.dovepress.com/article/496481)
Supplement: Supplementary file 1 [file get_supplementary_file.php]

**Supplementary materials**

1. Supplementary Table S1. **1000 Bootstrap of the Boruta algorithm.** - *Page 2*.
2. Supplementary Table S2. **VIFs of the 13 selected features within RSF model.** - *Page 3*.
3. Supplementary Table S3. **Hyperparametric search space and results.**

- *Page 3*.

1. Supplementary Table S4. **Web Application User Guide for Survival Prediction.** - *Page 4*.
2. Supplementary Fig. S1: **Heat map of Spearman’s correlation analyses among variables**. - *Page 5.*
3. Supplementary Fig.S2. **(A). The C-index value, (B) AUC, and (C) Brier score of the final RSF model in the internal validation cohort**. - *Page 6*.
4. Supplementary Fig. S3. **ROC curve analysis of the five machine learning algorithms for predicting OS in the internal validation cohort**. - *Page 6*.
5. Supplementary Fig. S4. **Decision curve analysis of the five machine learning algorithms for predicting OS in the internal validation cohort.** - *Page 7*.
6. Supplementary Fig. S5. **Screenshot of web app of RSF prognostic model**.

- *Page 8.*

| **Table S1. 1000 Bootstrap of the Boruta algorithm** | | | |
| --- | --- | --- | --- |
| **Training cohort** | | **External validation cohort** | |
| **Variables** | **Times** | **Variables** | **Times** |
| **Entered in the model** | | **Entered in the model** | |
| BCLC | 1000 | BCLC | 893 |
| PVTT | 1000 | PVTT | 802 |
| Tumor size | 1000 | Tumor size | 991 |
| Extrahepatic metastases | 1000 | Extrahepatic metastases | 957 |
| Metformin use | 1000 | Metformin use | 843 |
| AFP | 1000 | AFP | 845 |
| PT | 1000 | PT | 736 |
| Bilirubin | 1000 | Bilirubin | 930 |
| NLR | 1000 | NLR | 812 |
| Hemoglobin | 1000 | Hemoglobin | 836 |
| Liver cirrhosis | 976 | Liver cirrhosis | 858 |
| PLR | 1000 | PLR | 830 |
| HBA1c | 1000 | HBA1c | 803 |
| **Not entered in the model** | | **Not entered in the model** | |
| Creatinine | 530 | Creatinine | 446 |
| ECOG | 745 | ECOG | 8 |
| Hepatitis | 879 | Hepatitis | 207 |
| Hyperlipaemia | 743 | Hyperlipaemia | 25 |
| Hypertension | 736 | Hypertension | 55 |
| Leukocyte | 472 | Leukocyte | 549 |
| ALT | 659 | ALT | 511 |
| CHILD | 319 | CHILD | 15 |
| Coronary heart disease | 643 | Coronary heart disease | 1 |
| PSE or splenectomy | 313 | PSE or splenectomy | 132 |
| Duration | 784 | Duration | 438 |
| Age | 506 | Age | 439 |
| Tumor number | 330 | Tumor number | 73 |
| Albumin | 873 | Albumin | 805 |
| Two hour FGC | 742 | Two hour FGC | 578 |
| BMI | 607 | BMI | 433 |
| FPG | 834 | FPG | 594 |
| Gender | 686 | Gender | 32 |

| **Table S2. VIFs of the 13 selected features within RSF model** | |
| --- | --- |
| BCLC | 1.603 |
| PVTT | 1.506 |
| Tumor size | 1.453 |
| Metformin use | 1.054 |
| Extrahepatic metastases | 1.302 |
| AFP | 1.244 |
| PT | 1.035 |
| Hemoglobin | 1.041 |
| NLR | 1.165 |
| Bilirubin | 1.021 |
| PLR | 1.273 |
| Liver cirrhosis | 1.069 |

| **Table S3. Hyperparametric search space and results** | | |
| --- | --- | --- |
| **Parameters** | **Range** | **Result** |
| **Coxph** | | |
| none | none | none |
| **XGboost** | | |
| nrounds | [100,300] | 107 |
| max_depth | [2.0,4.0] | 2.0 |
| eta | [0.01,0.3] | 0.111 |
| **GBM** | | |
| n.trees | [100,1000] | 100 |
| shrinkage | [0.001,0.1] | 0.034 |
| interaction.depth | [1,5] | 3 |
| **RSF** | | |
| ntree | [200,500] | 500 |
| mtry | [3,5] | 3 |
| nodesize | [15,21] | 21 |
| **Rpart** | | |
| cp | [0.001,0.1] | 0.001 |
| minsplit | [1,20] | 20 |

| **Table S4. Web Application User Guide for Survival Prediction** |
| --- |
| **Step 1** |
| Access the website (<https://osprediction.shinyapps.io/survival_1y_2y_3y_prediction/>) from any internet-enabled device. |
| **Step 2** |
| Click the **"Application"** button to enter the prediction interface. |
| **Step 3** |
| Input the patient's preoperative clinical information into the **"Variables of New sample"** section under the **"Predict new observation"** heading, and then click the **"Predict"** button. The web application will automatically calculate the patient’s 1-, 2-, and 3-year survival probabilities, displaying the results graphically in the **"PredictSurvProb"** section. |
| **Note:** If the predicted value for a given time point is greater than 0.5, the patient is predicted to survive; otherwise, the patient is predicted to not survive. |

| 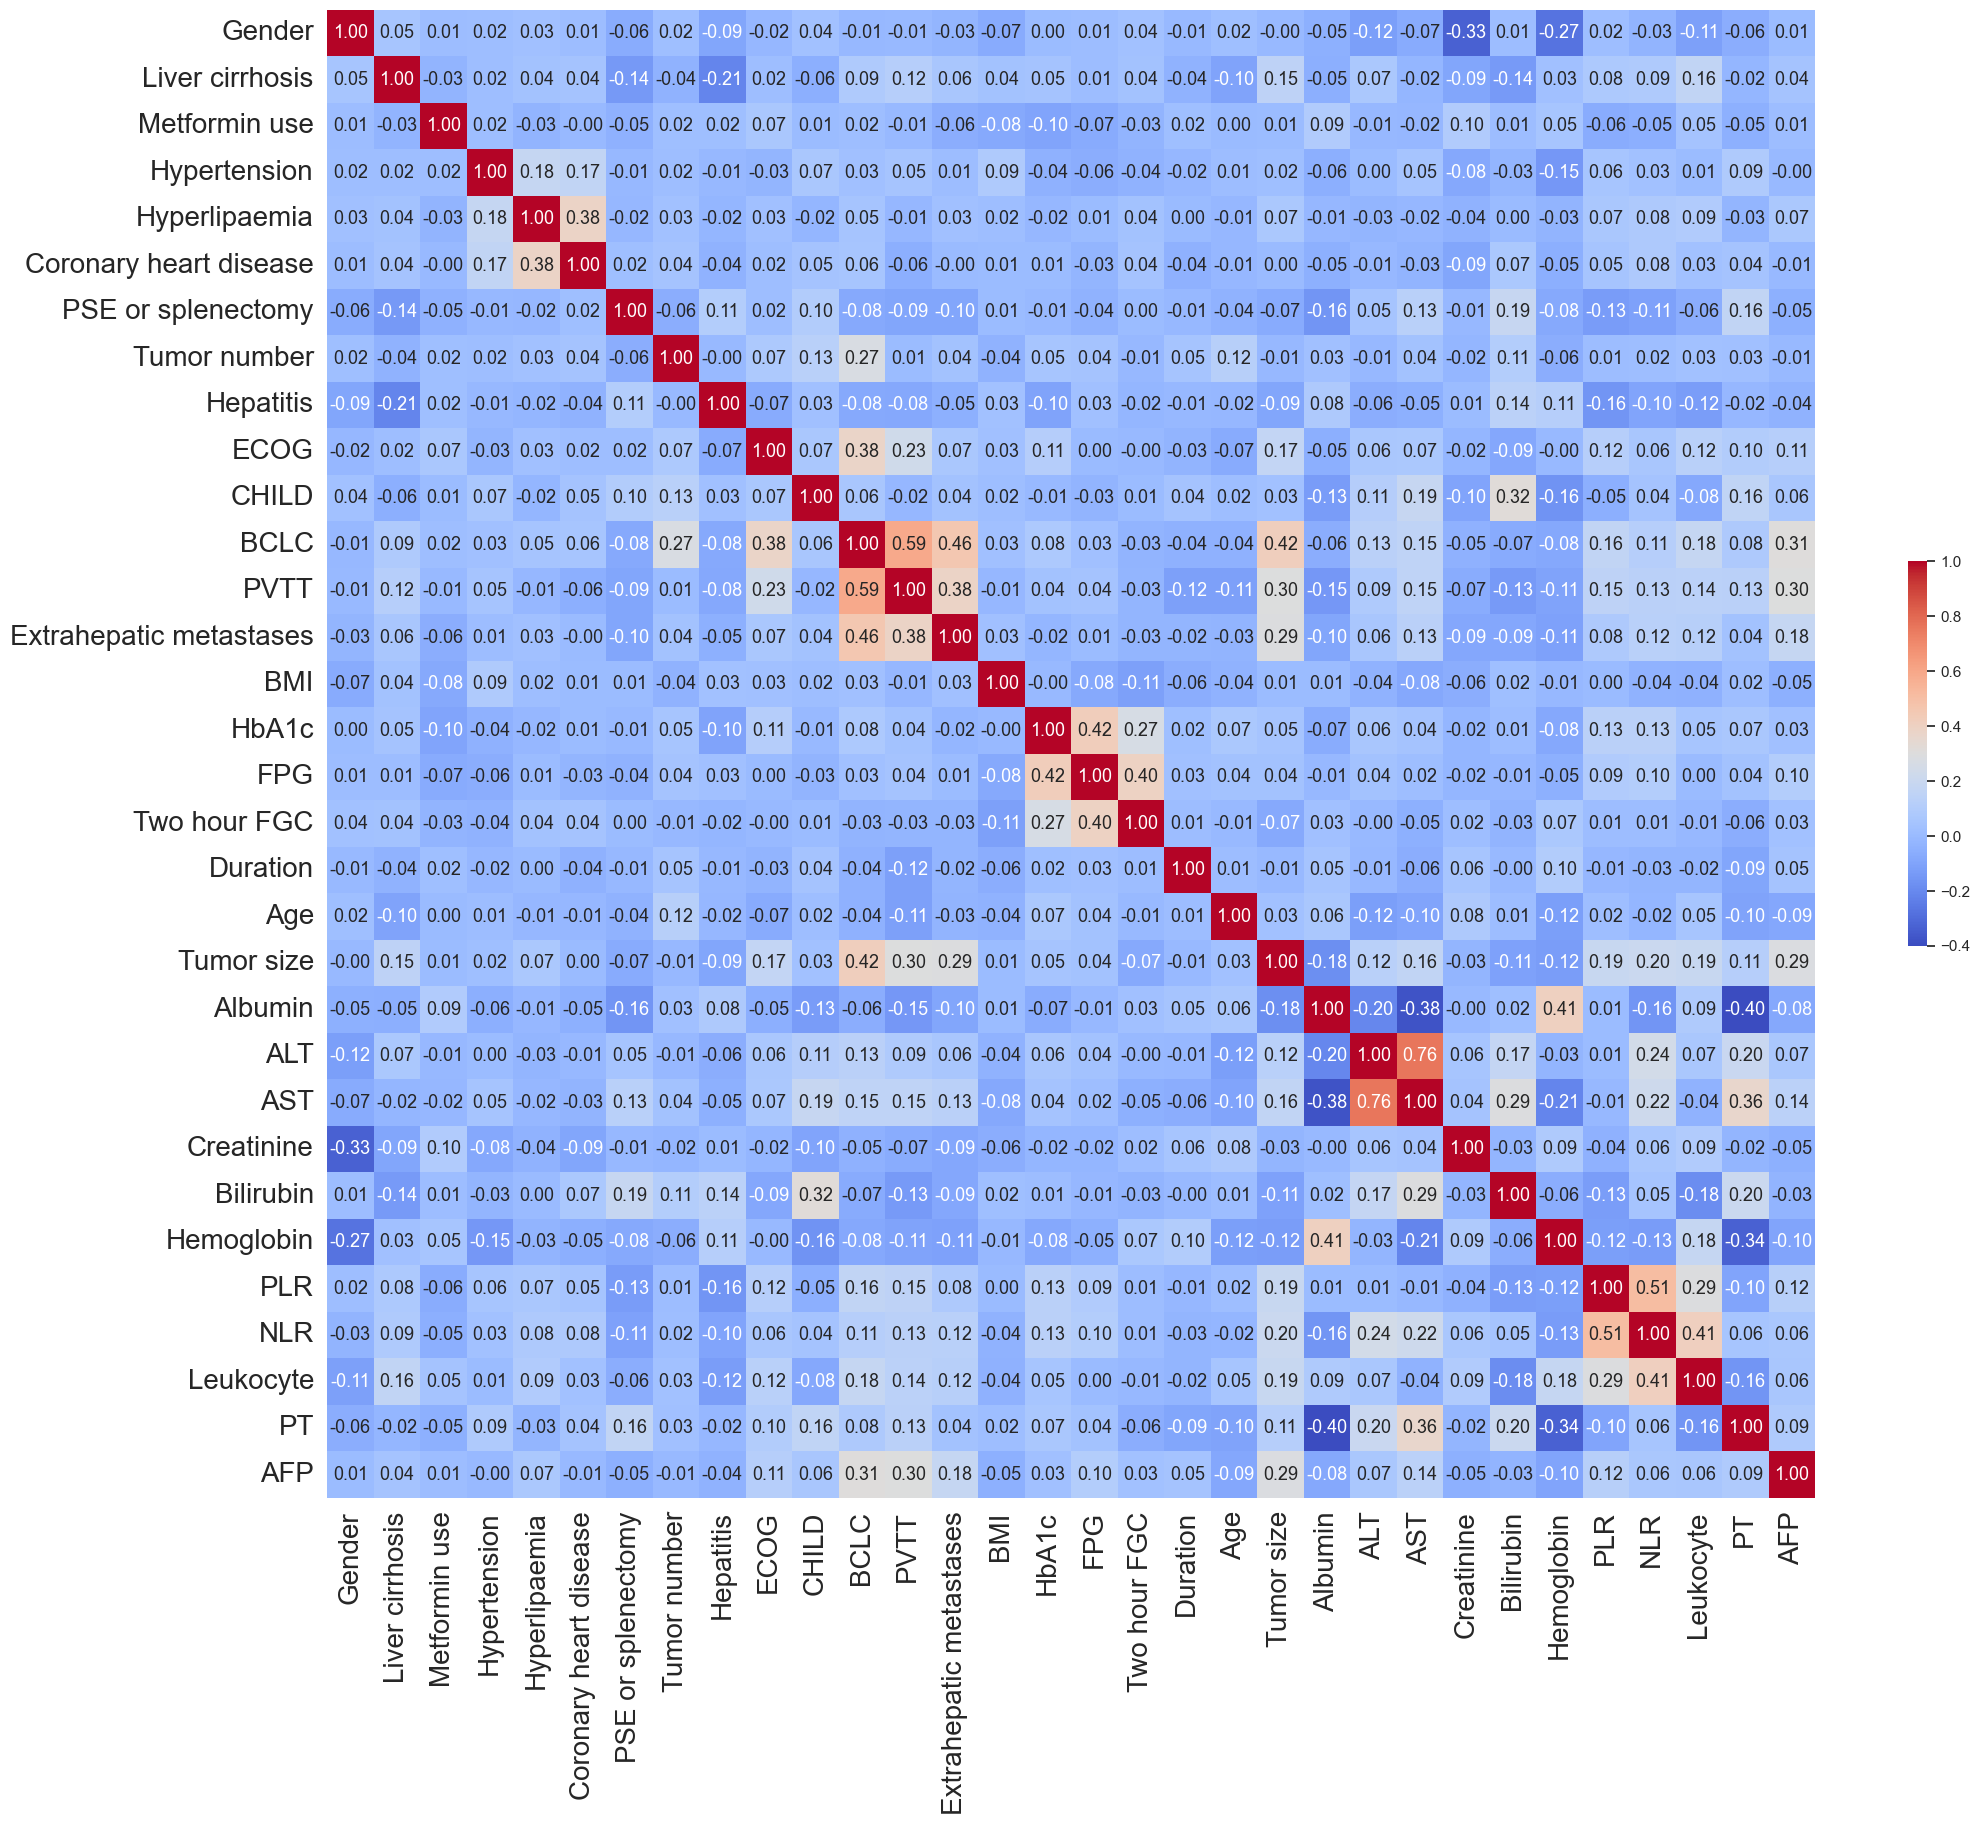 |
| --- |
| **Fig. S1.** Heat map of Spearman’s correlation analyses among variables.  Variables of HCC patients who underwent TACE with diabetes from the derivation cohort were included in Spearman’s correlation analyses. Variables in Supplemental Table S1 were chosen for the Spearman’s correlation analyses, and the correlation coefficient values were displayed as a heat map.  AFP = Alpha-Fetoprotein; ALT= Alanine aminotransferase; AST = Aspartate aminotransferase; BCLC = Barcelona Clinic Liver Cancer; BMI =Body mass index; CHILD = Child-Pugh score; ECOG = Eastern Cooperative Oncology Group performance status; FPG = Fasting plasma glucose; HbA1c = Glycosylated hemoglobin; NLR = Neutrophil-to-Lymphocyte Ratio**;** PLR = Platelet-to-Lymphocyte Ratio; PT = Prothrombin time. PVTT =Portal Vein Tumor Thrombosis. |
| 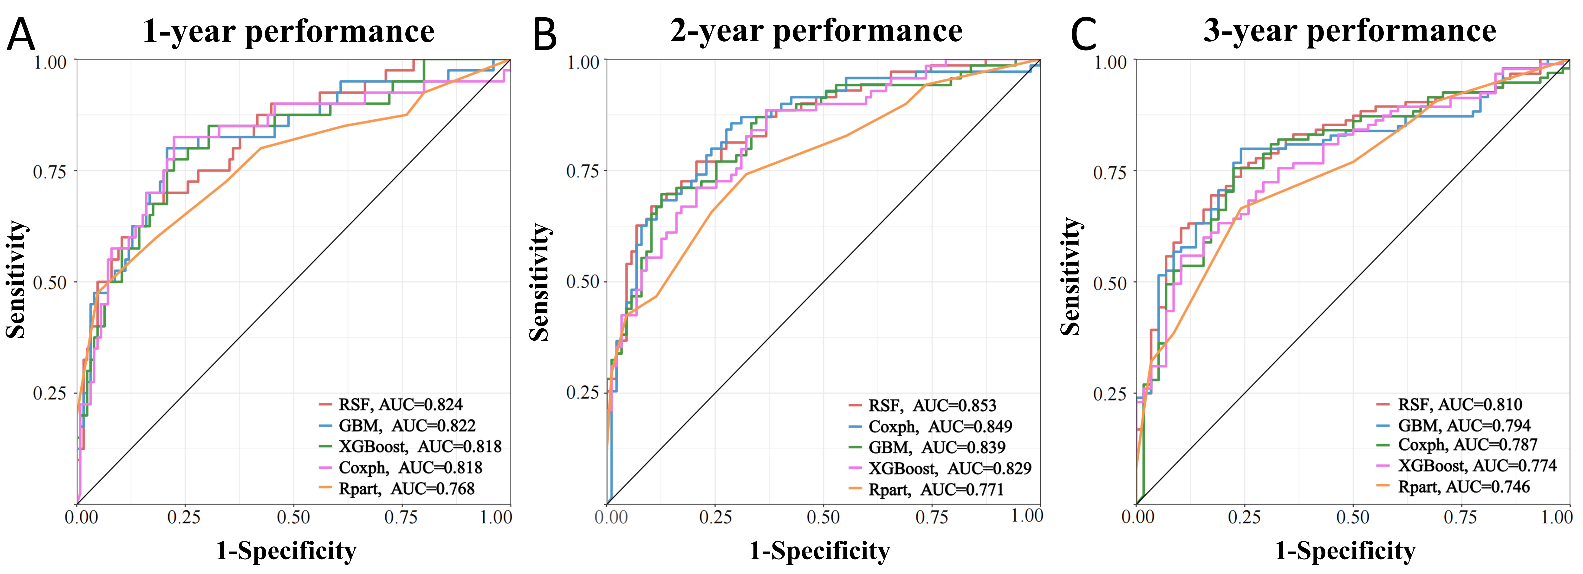 |
| **Fig. S2.** ROC curve analysis of the five machine learning algorithms for predicting OS in the internal validation cohort. |

| 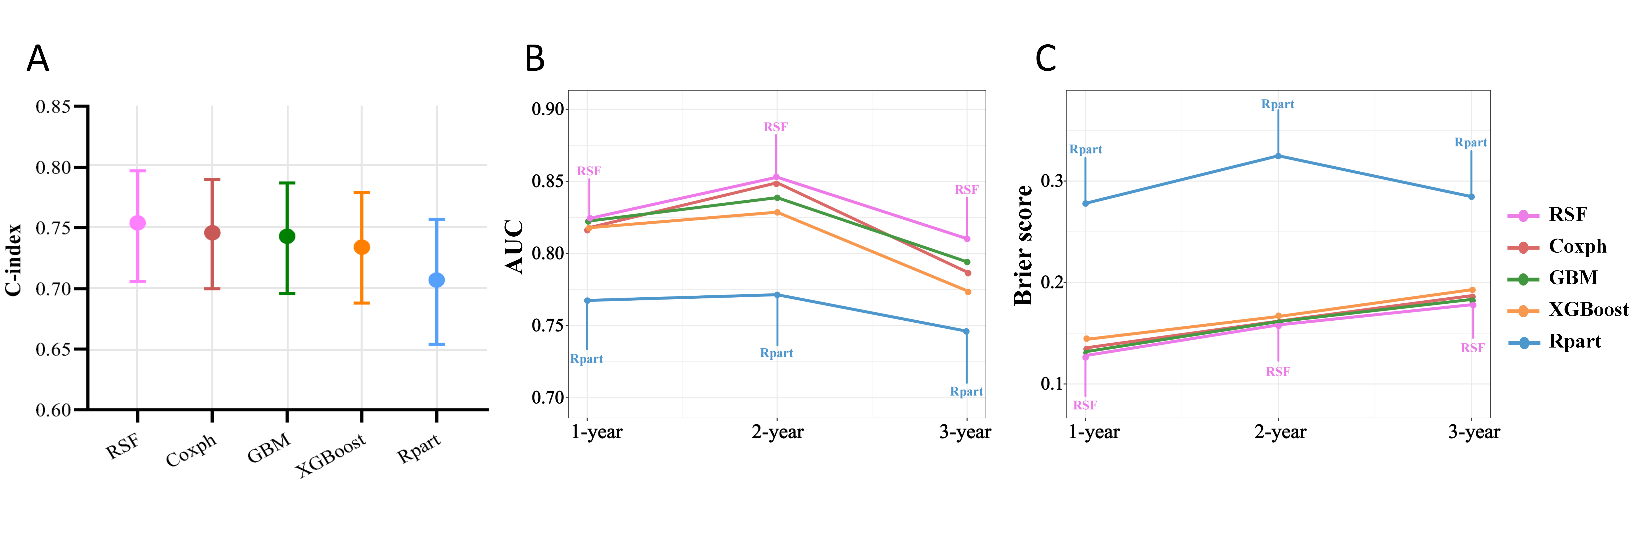 |
| --- |
| **Fig. S3.** (A). The C-index value, (B) AUC, and (C) Brier score of the final RSF model in the internal validation cohort. AUC: Area Under Curve; RSF: random survival forest. |

| 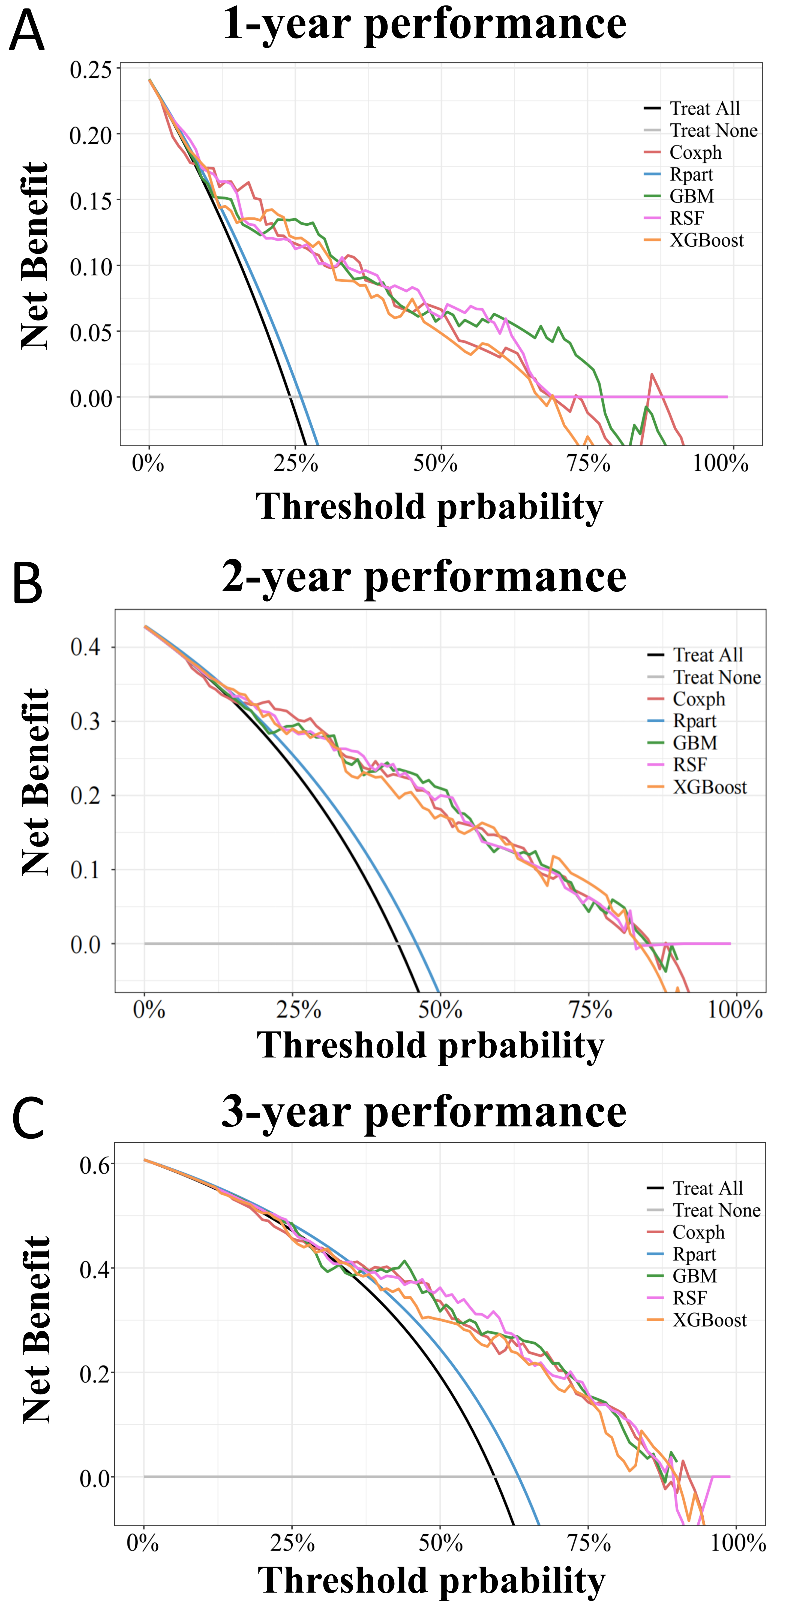 |
| --- |
| **Fig. S4.** Decision curve analysis of the five machine learning algorithms for predicting OS in the internal validation cohort. |

| **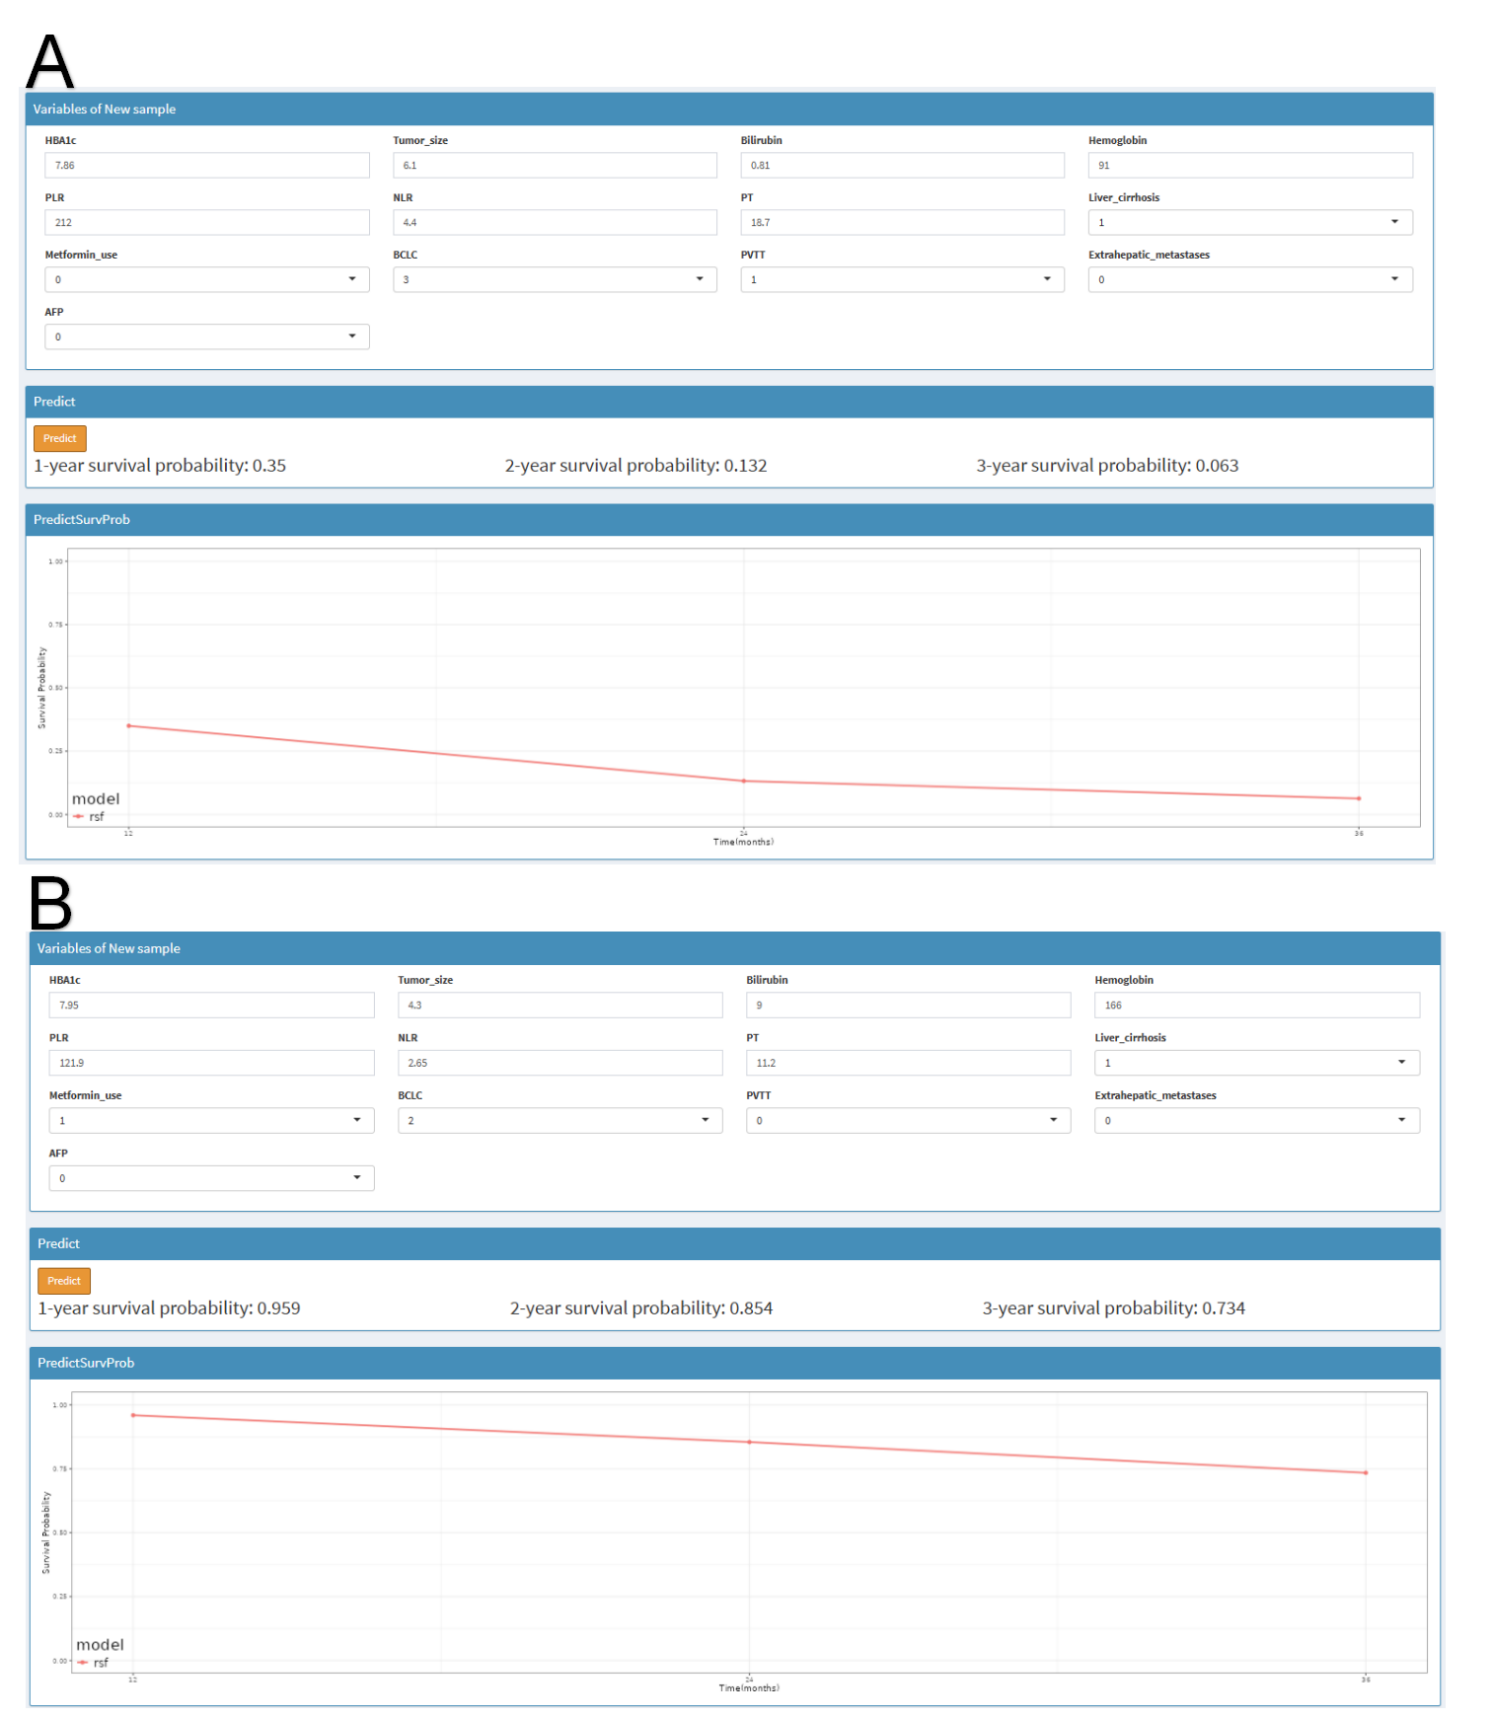** |
| --- |
| **Fig. S5.** Online prediction model for 1-, 2-, and 3-year survival probabilities in HCC patients with diabetes after TACE. (A). For a case with a 7-month survival, the model predicted 1-year, 2-year, and 3-year survival probabilities to be 0.35, 0.132, and 0.063, respectively (B). For a case with a 42-month survival, the model predicted 1-year, 2-year, and 3-year survival probabilities to be 0.959, 0.854, and 0.734, respectively.  HCC, hepatocellular carcinoma; TACE, transarterial chemoembolization |
